# Supplementary material for: Mitigation of endemic GI-tract pathogen-mediated inflammation through development of multimodal treatment regimen and its impact on SIV acquisition in rhesus macaques
Source: PubMed Central journal article supplement (PMC8148316; doi:10.1371/journal.ppat.1009565), 2021-05-10
Supplement: ppat.1009565.s001.pdf [file ppat.1009565.s001.pdf]

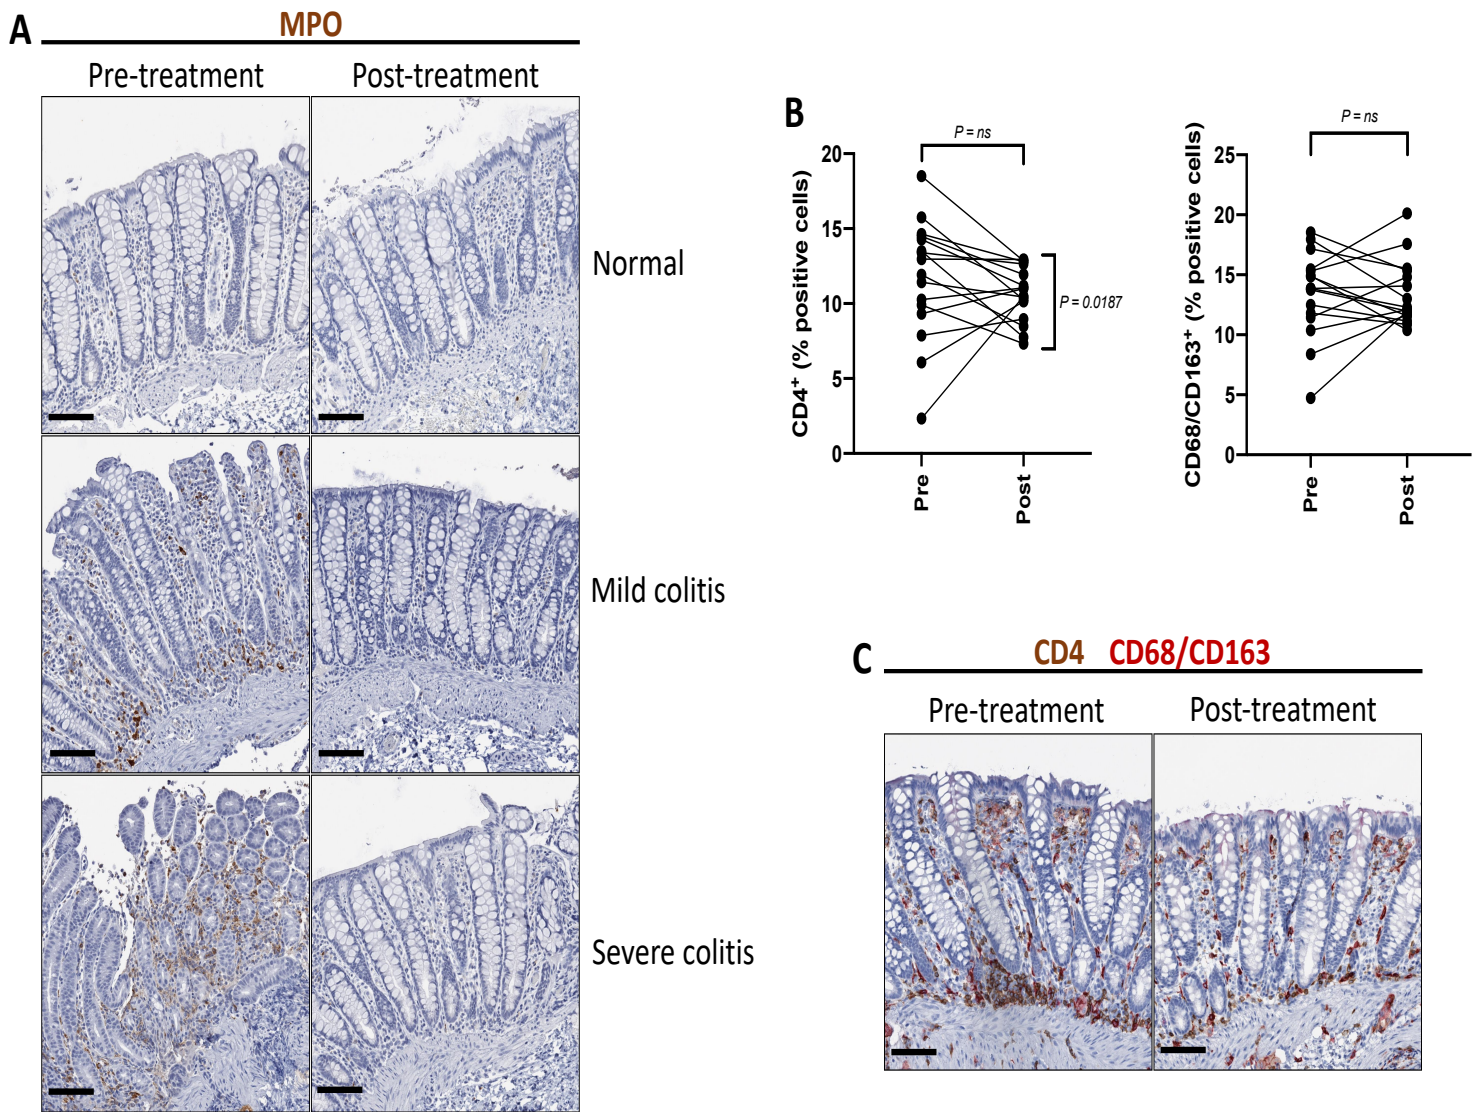

**Supplemental Figure 1. Inflammation is reduced, and T cell infiltration normalized, in the descending colon following treatment.**

(A) Representative images of formaldehyde-fixed, paraffin-embedded descending colon biopsies demonstrate the dramatically reduced neutrophil recruitment (MPO) observed following the clean-up regimen. (B) IHC quantification of CD4+ T cells and macrophages (CD68/CD163) was performed using HALO, which demonstrated markedly reduced inter-animal variance ( $P=0.0187$ ) assessed by Wilcoxon signed-rank test. (C) Despite a negligible change in overall IHC staining (CD4+ and CD68/CD163) between pre and post-treatment groups (scale bars =  $100\mu\text{m}$ ).
