# Supplementary material for: Mitigation of endemic GI-tract pathogen-mediated inflammation through development of multimodal treatment regimen and its impact on SIV acquisition in rhesus macaques
Source: PubMed Central journal article supplement (PMC8148316; doi:10.1371/journal.ppat.1009565), 2021-05-10
Supplement: ppat.1009565.s003.pdf [file ppat.1009565.s003.pdf]

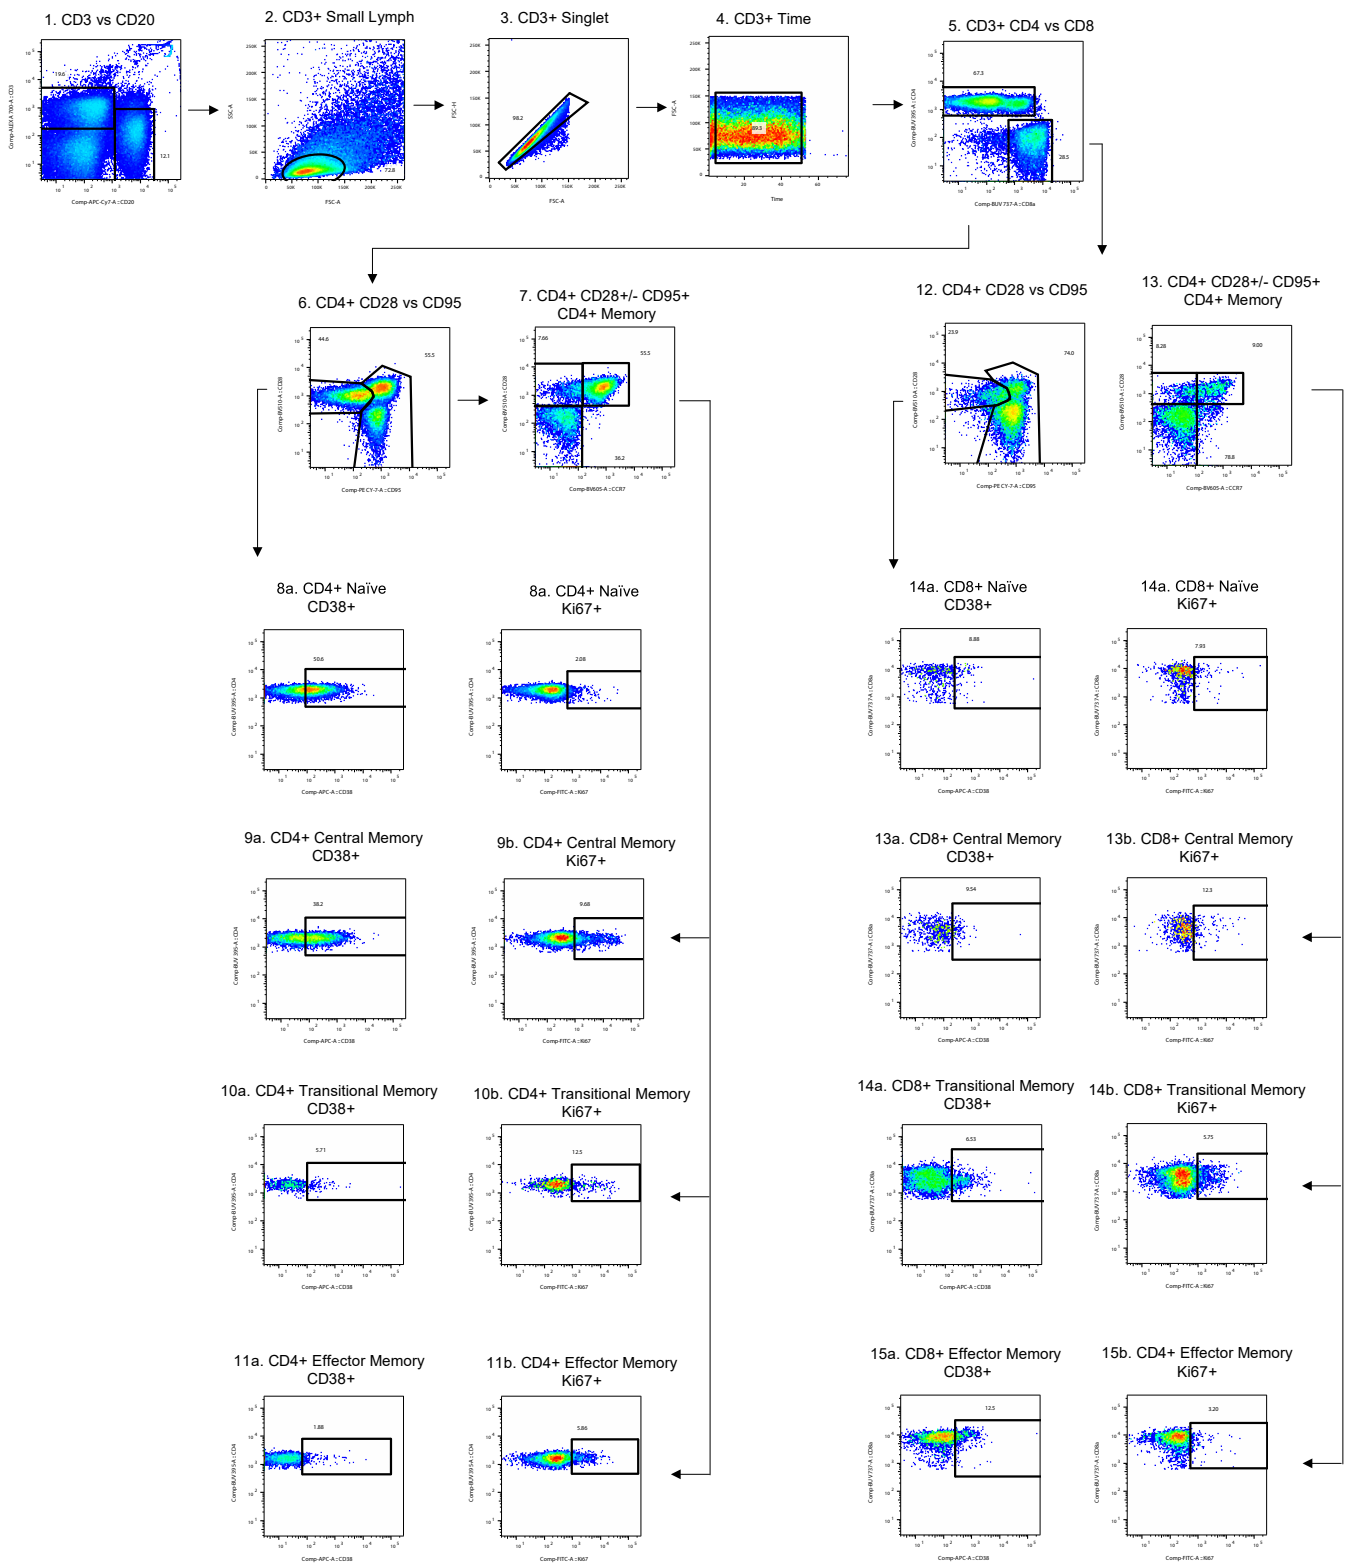

**Supplemental Figure 3. T cell gated hierarchy.**

Whole blood and tissue-derived lymphocytes were stained using fluorophore conjugated monoclonal antibodies and analysis was performed using a LSR II Becton Dickinson instrument. The resulting list mode multi-parameter data files were analyzed using the FlowJo software program (version 9.9.6; Ashland, OR: Becton, Dickinson and Company; 2020) with the hierarchy shown here. CD3<sup>+</sup> small lymphocytes were selected and divided into CD4<sup>+</sup> and CD8<sup>+</sup> T cell subsets, then defined as memory and naïve T cell subset populations based on CD28 and CD95 expression patterns. Memory subsets were then further differentiated by their expressions of CD28 and CCR7. Naïve (CD28<sup>+</sup> CD95<sup>-</sup>), central memory (CD28<sup>+</sup> CD95<sup>+</sup> CCR7<sup>+</sup>), transitional memory (CD28<sup>+</sup> CD95<sup>+</sup> CCR7<sup>-</sup>), and effector memory (CD28<sup>-</sup> CD95<sup>+</sup> CCR7<sup>-</sup>) T cells were then analyzed for subsets manifesting upregulation of the markers for activation (CD38) and proliferation (Ki67).
