# Supplementary material for: Mitigation of endemic GI-tract pathogen-mediated inflammation through development of multimodal treatment regimen and its impact on SIV acquisition in rhesus macaques
Source: PubMed Central journal article supplement (PMC8148316; doi:10.1371/journal.ppat.1009565), 2021-05-10
Supplement: ppat.1009565.s004.pdf [file ppat.1009565.s004.pdf]

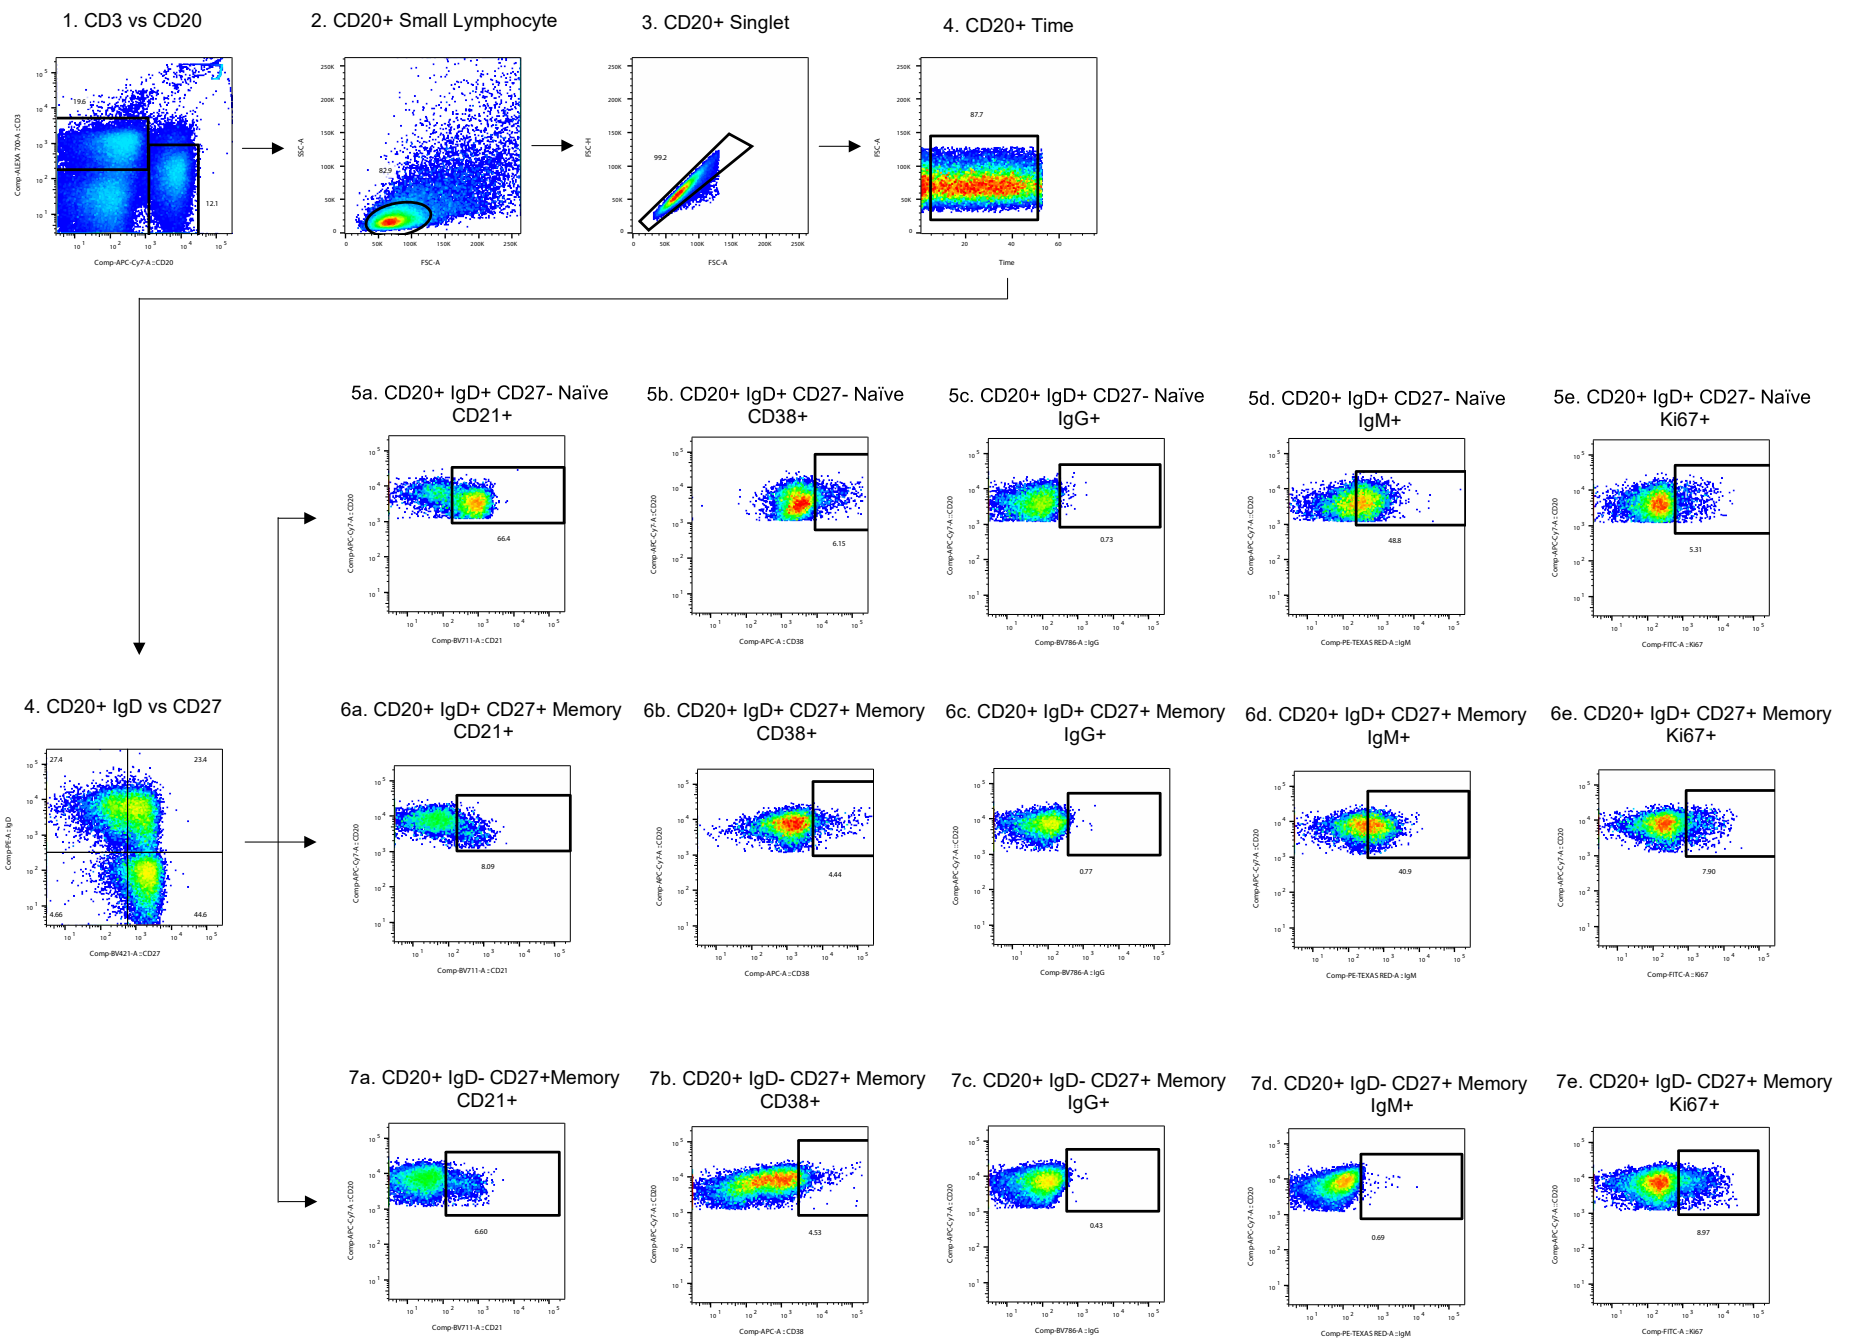

**Supplemental Figure 4. B cell gated hierarchy.**

Whole blood and tissue-derived lymphocytes were stained and analyzed using the software described above. CD20<sup>+</sup> small lymphocytes were selected and divided into memory (IgD<sup>+</sup>-CD27<sup>+</sup>) and naïve (IgD<sup>+</sup> CD27<sup>-</sup>) B cell subsets. The subsets were further analyzed for upregulation of activation marker CD38, proliferation marker Ki67, complement receptor CD21, as well as surface expression of immunoglobulins G and M.
